# Supplementary material for: Recurrent Herpes Simplex Virus Type 1 (HSV-1) Infection Modulates Neuronal Aging Marks in In Vitro and In Vivo Models
Source: MDPI journal article supplement (doi:10.3390/ijms22126279), 2021-06-11
Supplement: s1 [file s1]

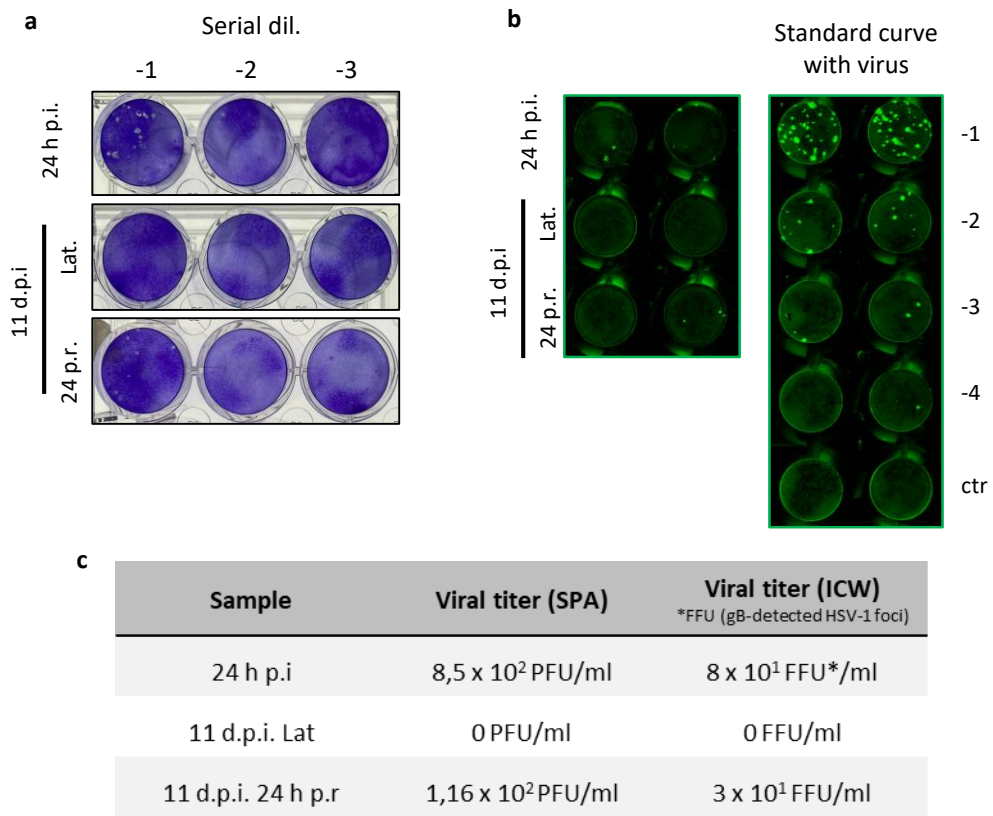

**Figure S1. Virus titration in cell supernatants from the in vitro model of recurrent HSV-1 infection.** Cell supernatants were harvested from neurons infected with 0.1 M.O.I. of HSV-1 for 24 h (24 h p.i.), 11 days in the presence of ACV (11 d.p.i. LAT) and 24 h post reactivation (11 d.p.i. 24 h p.r.) as described in materials and methods. **a)** images of Standard Plaque Assay (SPA) of a representative experiment; **b)** representative images of In Cell Western showing gB-stained HSV-1 foci of the same samples titred in panel a (left image) and of a reference standard curve of HSV-1 virus (right panel). **c)** virus titers of samples from the representative experiment showed in panel a and b
